# Supplementary material for: Optical, electrochemical, photoelectrochemical and electrochromic properties of polyamide/graphene oxide with various feed ratios of polyamide to graphite oxide
Source: Royal Society of Chemistry journal article supplement (doi:10.1039/c3tc32078b), 2014-01-01
Supplement: c3tc32078b.pdf [file c3tc32078b.pdf]

## Supporting Information

### Optical, Electrochemical, Photoelectrochemical and Electrochromic Properties of Polyamide /Graphene Oxide with Various Feed Ratios of Polyamide to Graphite Oxide

Lina Ma<sup>1</sup>, Haijun Niu<sup>1\*</sup>, Jiwei Cai<sup>1</sup>, Ping Zhao<sup>2</sup>, Cheng Wang<sup>1</sup>, Yongfu Lian<sup>1</sup>, Xuduo Bai<sup>1</sup>, Wen Wang<sup>3\*</sup>

<sup>1</sup>Key Laboratory of Functional Inorganic Material Chemistry, Ministry of Education, Department of Macromolecular Materials and Engineering, School of Chemical and Chemical Engineering, Heilongjiang University, Harbin 150086, P R China. Tel: 086-0451-86608616, E-mail: haijunniu@hotmail.com (Haijun Niu)

<sup>2</sup>Key Laboratory for Advanced Materials and Institute of Fine Chemicals, East China University of Science and Technology, Shanghai 200237, P R China

<sup>3</sup>School of Material Science and Engineering, Harbin Institute of Technology, Harbin 150080, P R China

\* Author to whom correspondence should be addressed

## 1. Synthesis of Monomers

*N,N'*-Bis(4-aminophenyl)-*N,N'*-di-2-naphthalenyl-1,4-benzenediamine was synthesized with modified method according to the literature [1].

**Scheme. S1** Synthesis route of Monomers

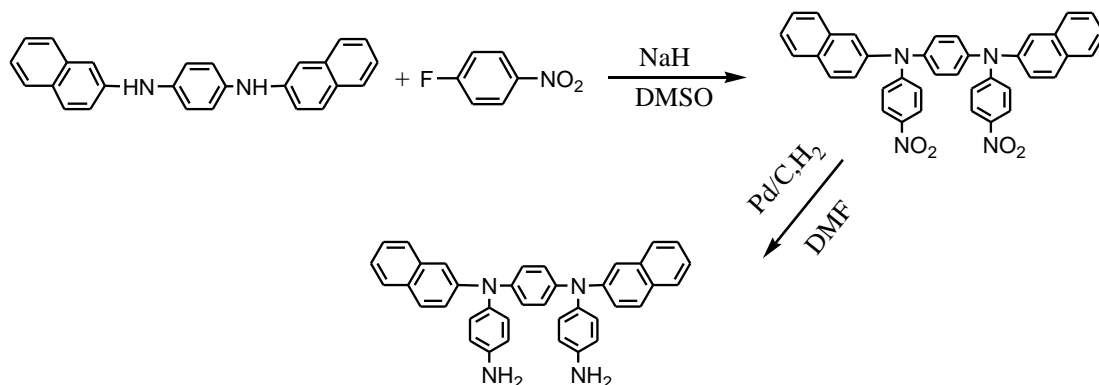

2.

## Synthesis of graphene oxide (GO) and acryl chloride-functionalized graphene oxide (GO)

In a typical procedure, graphite (1 g, 325 mesh) and NaNO<sub>3</sub> (0.5 g) were mixed with concentrated H<sub>2</sub>SO<sub>4</sub> (25 mL) in a 250 mL flask at 0 °C. The temperature was kept at 5 °C, and the mixture was stirred for 1 h. After that, 3.0 g of KMnO<sub>4</sub> was added in three portions every 10 min with vigorous stirring to prevent temperature rise in excess of 15 °C. Then, the temperature of the reaction mixture was raised to 35±2 °C and the mixture was stirred for 4 h. After completion of the reaction, 100 mL of deionized water was gradually added into the solution. The suspension was reacted further by adding a mixture of H<sub>2</sub>O<sub>2</sub> (30 mL, 30%) and water (55 mL). The mixture was centrifuged at 6000 rpm for 8 min. The resulting GO was precipitated at the bottom of the vial. The red-brown solid were repeatedly washed with diluted HCl (3%, 150 mL) and deionized water and centrifuged for 3-4 times, then dried under reduced pressure for 24 h.

Pre-synthesized GO (305.8 mg) was loaded in a 500 mL round bottom flask and water (300 mL) was then added, yielding an inhomogeneous yellow-brown dispersion. This dispersion was sonicated using a DL-720A ultrasonic bath cleaner (500 W) until it became clear with no visible particulate matter. The obtained brown dispersion was then filtered, and dried under reduced pressure overnight.

GO (0.0504 g) was reacted with a large excess of thionyl chloride (10 ml) containing a

catalytic amount of dried DMF under reflux for 24 h under a nitrogen atmosphere, followed by the removal of the residual thionyl chloride under vacuum. The products was dried in vacuum at 40 °C for 48 h which giving acryl chloride-functionalized GO.

### Scheme. S2 Synthesis route of PA

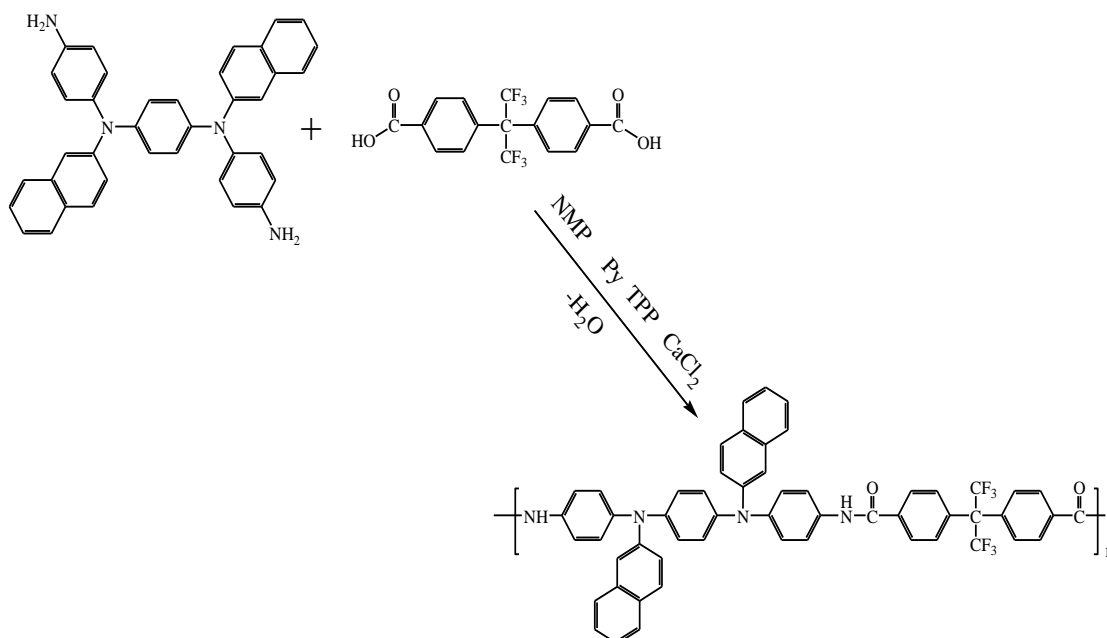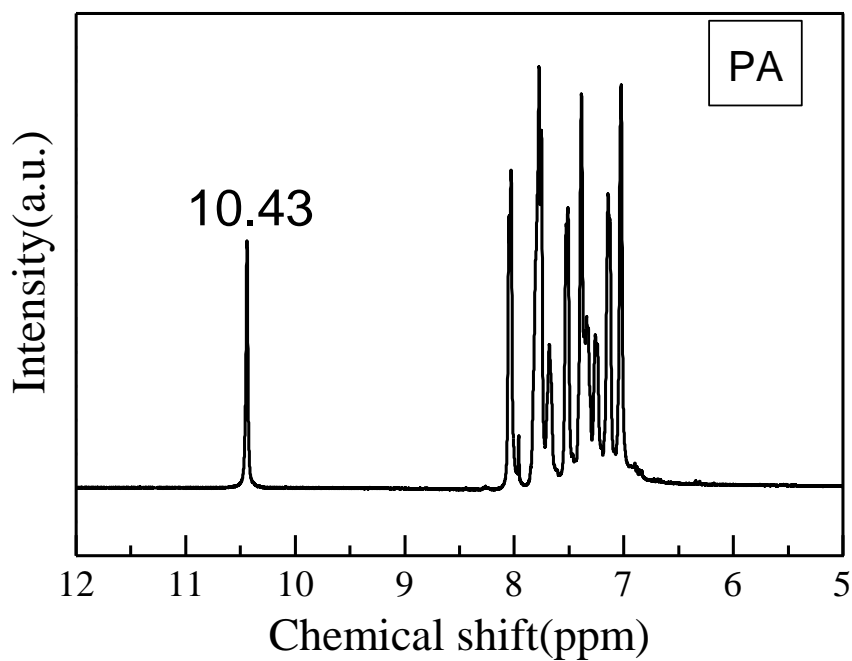

Fig. S1 <sup>1</sup>H NMR spectra of PA

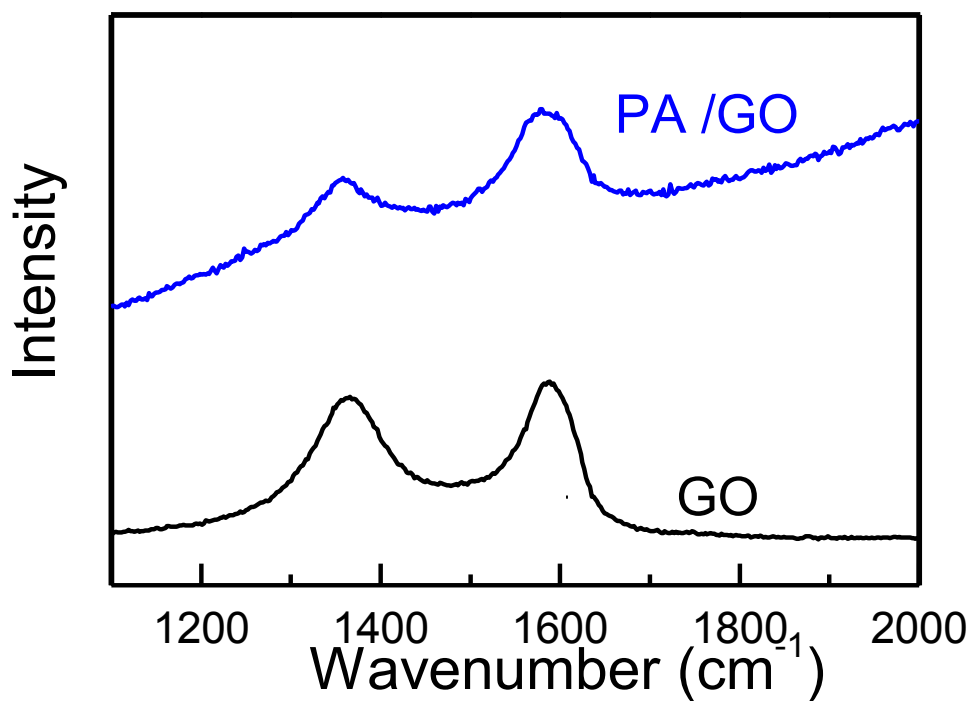

Fig. S2 Raman spectra of GO and PA /GO

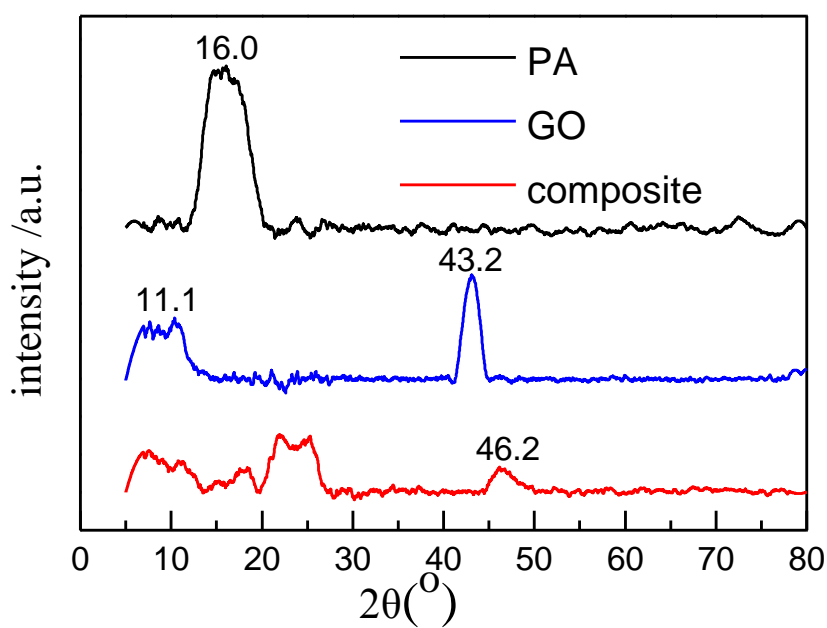

Fig. S3 XRD patterns of PA, GO and PA /GO composite.

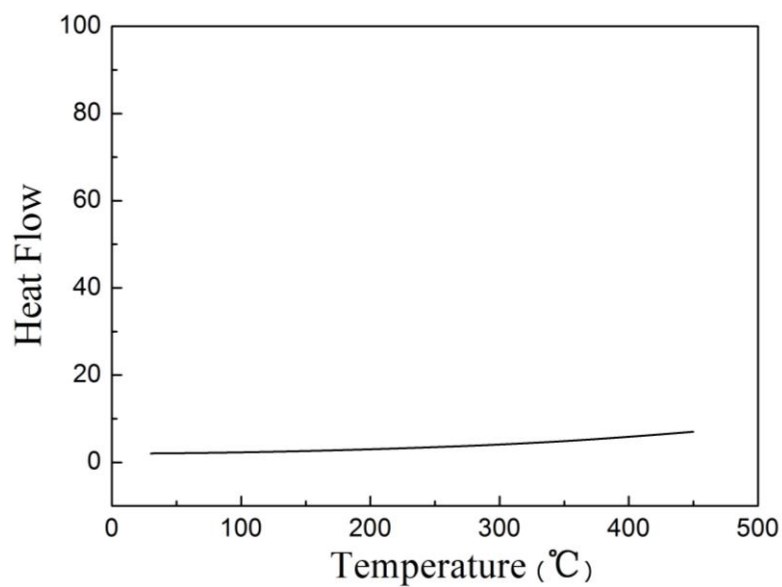

**Fig. S4** DSC curve of PA /GO composite.

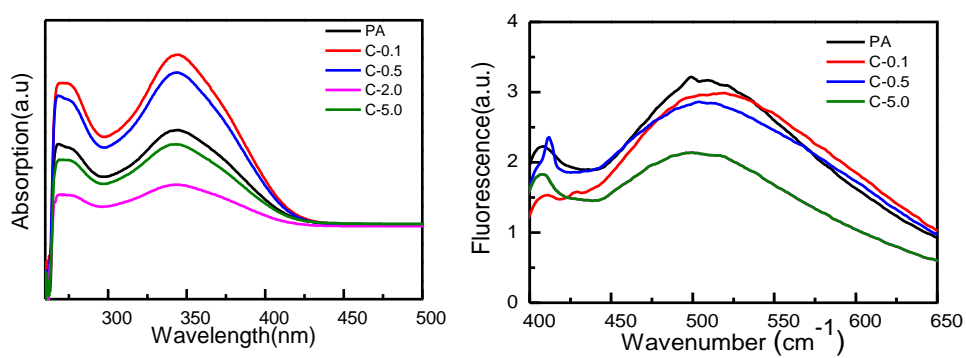

**Fig. S5** The UV-visible absorption spectra (a) and fluorescence emission spectra (b) of PA and composites in DMF at room temperature (composite concentration:  $1 \times 10^{-6}$  M).

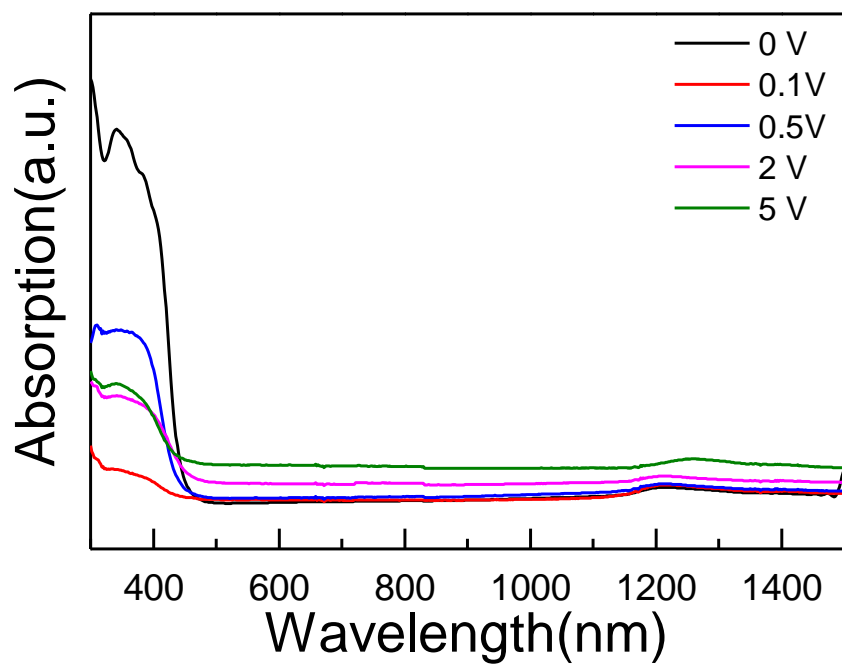

**Fig. S6** UV-Visible absorption spectra of composites (film)

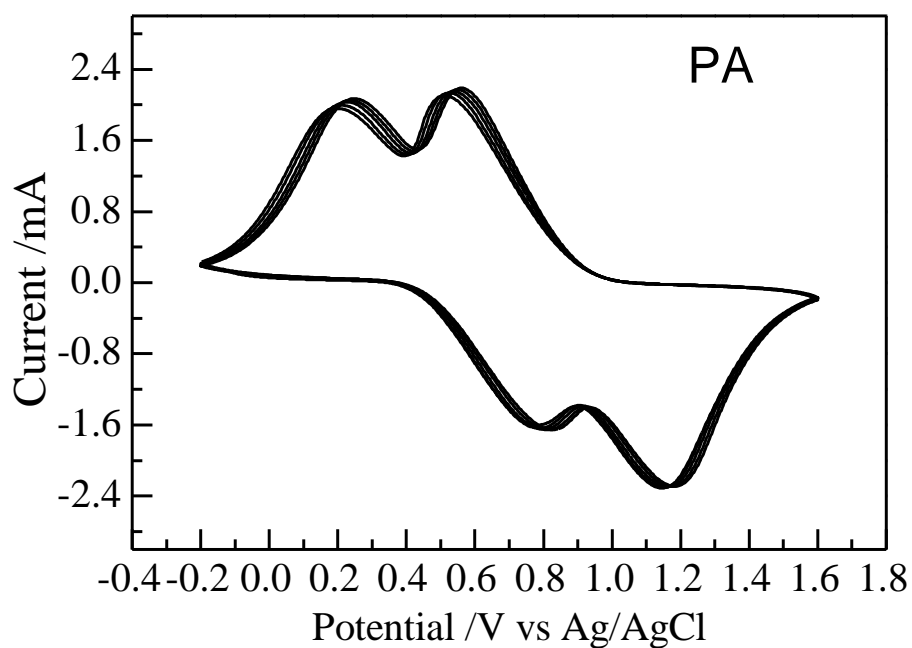

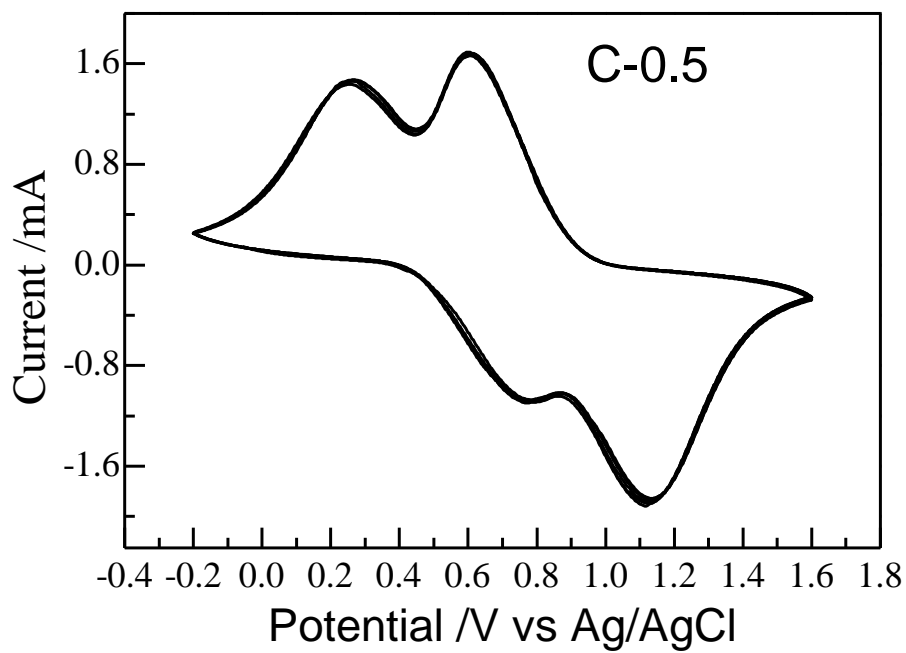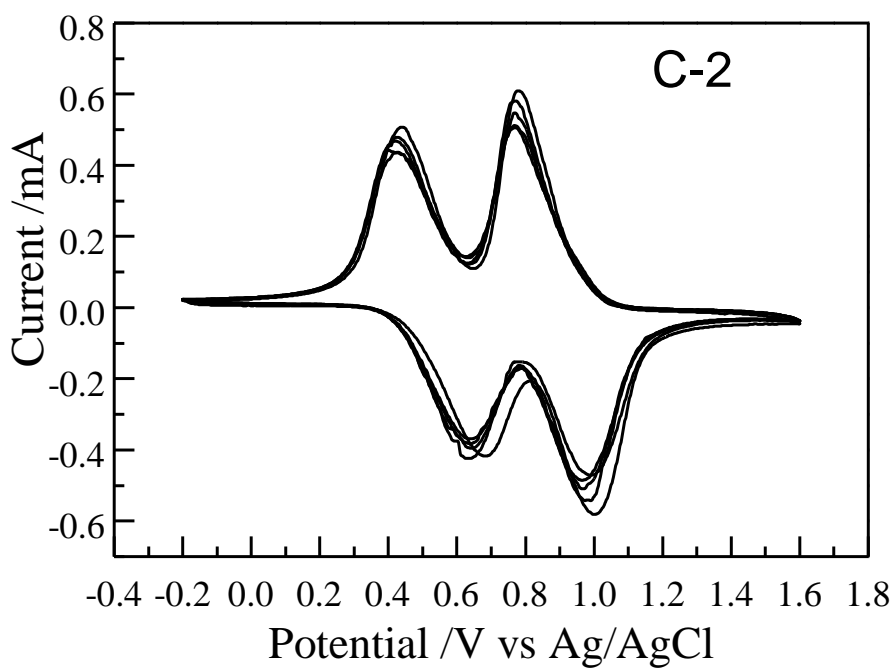

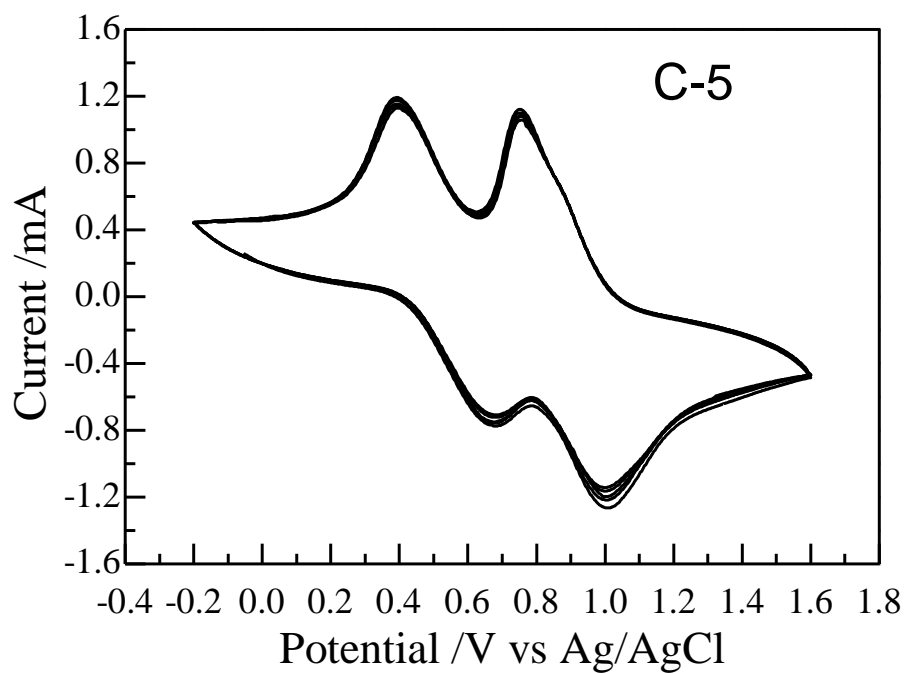

**Fig. S7** Cyclic voltammograms for PA and composites in CH<sub>3</sub>CN/0.1 M LiClO<sub>4</sub> with Fc/Fc<sup>+</sup> as an internal standard, at 50 mV s<sup>-1</sup>.

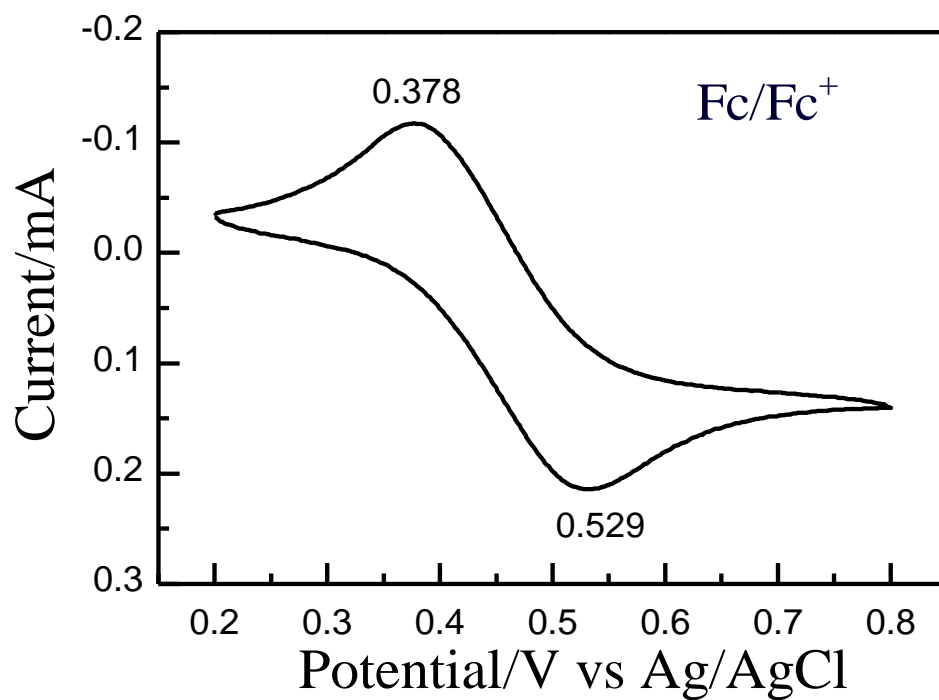

**Fig. S8** Cyclic voltammograms for ferrocene/ferrocenium (Fc/Fc<sup>+</sup>) in CH<sub>3</sub>CN/0.1 mol L<sup>-1</sup> LiClO<sub>4</sub> at 50 mV s<sup>-1</sup>.



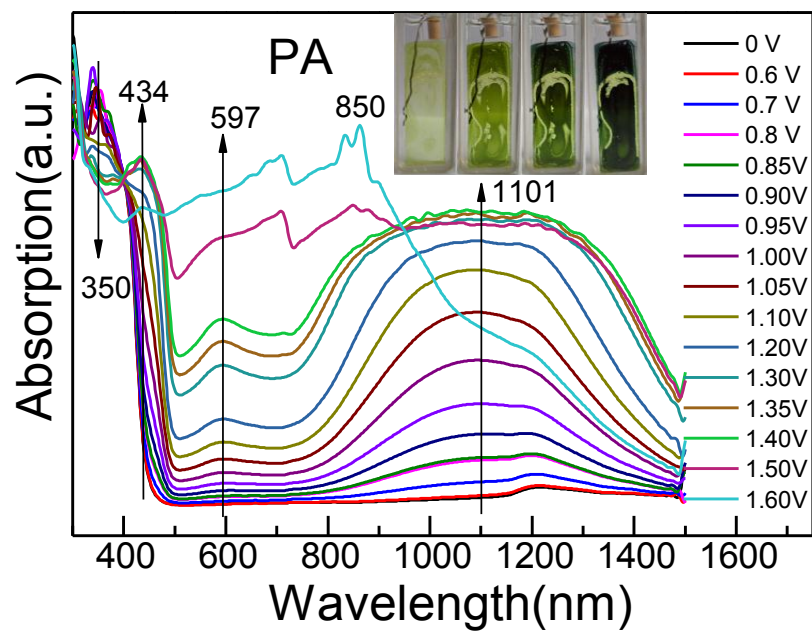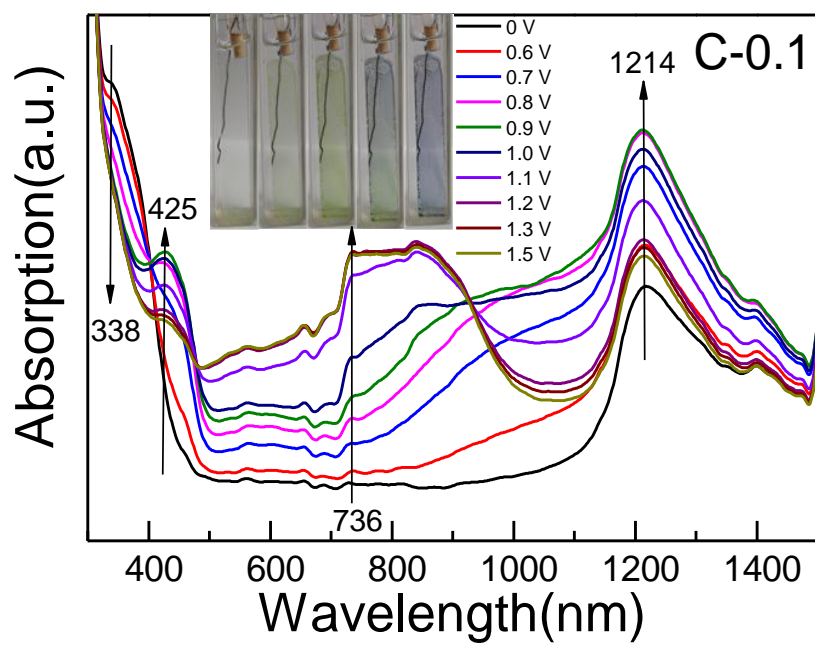

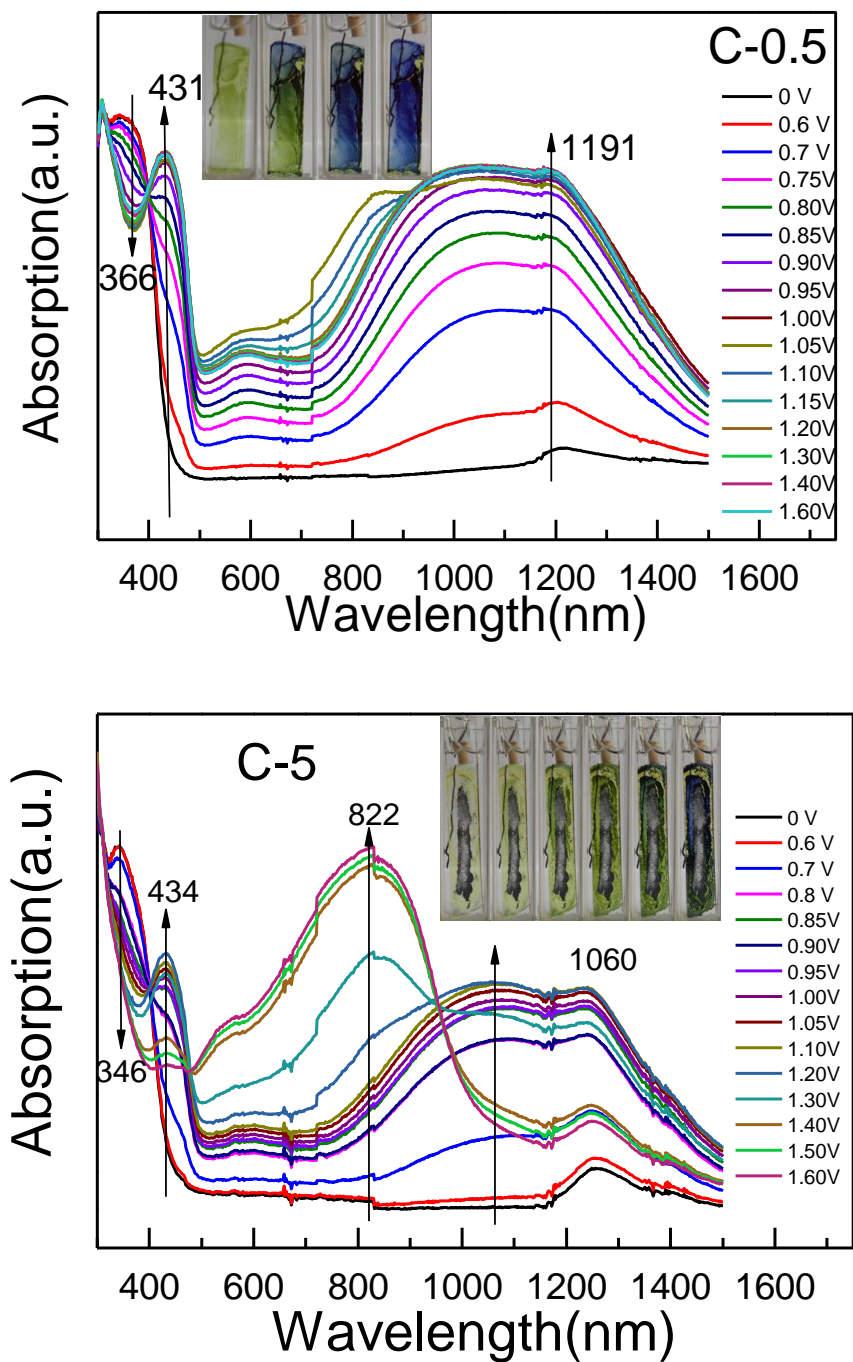

**Fig. S9** Electrochromic behavior of C-0.1, C-0.5 and C-5 thin films (in  $\text{CH}_3\text{CN}$  with 0.1 M  $\text{LiClO}_4$  as the supporting electrolyte) between 0.0 and 1.6 V (V vs. Ag/AgCl). ( insets are the pictures of doped composites).

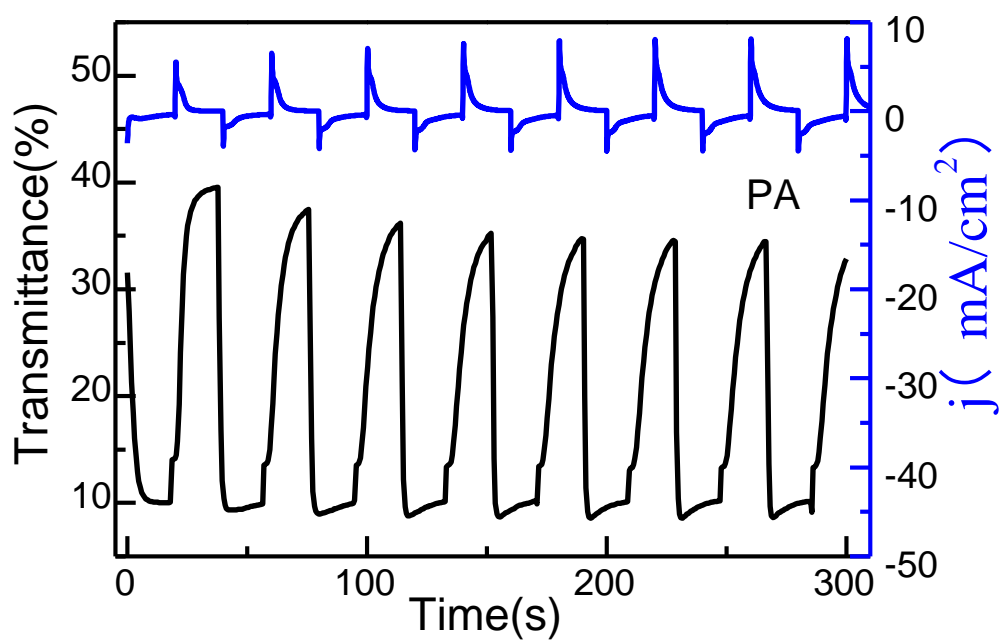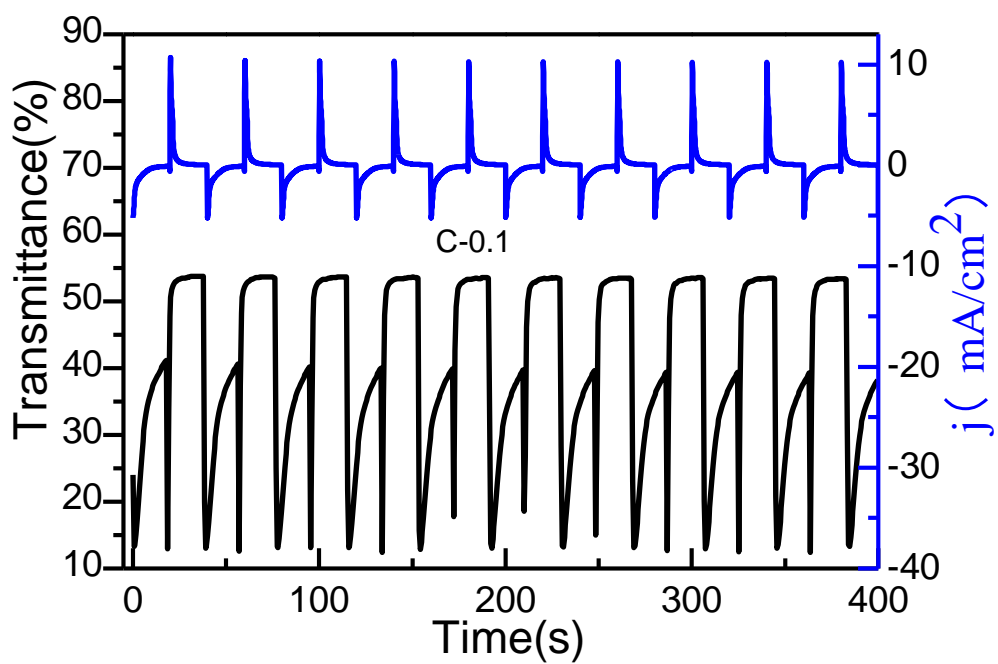

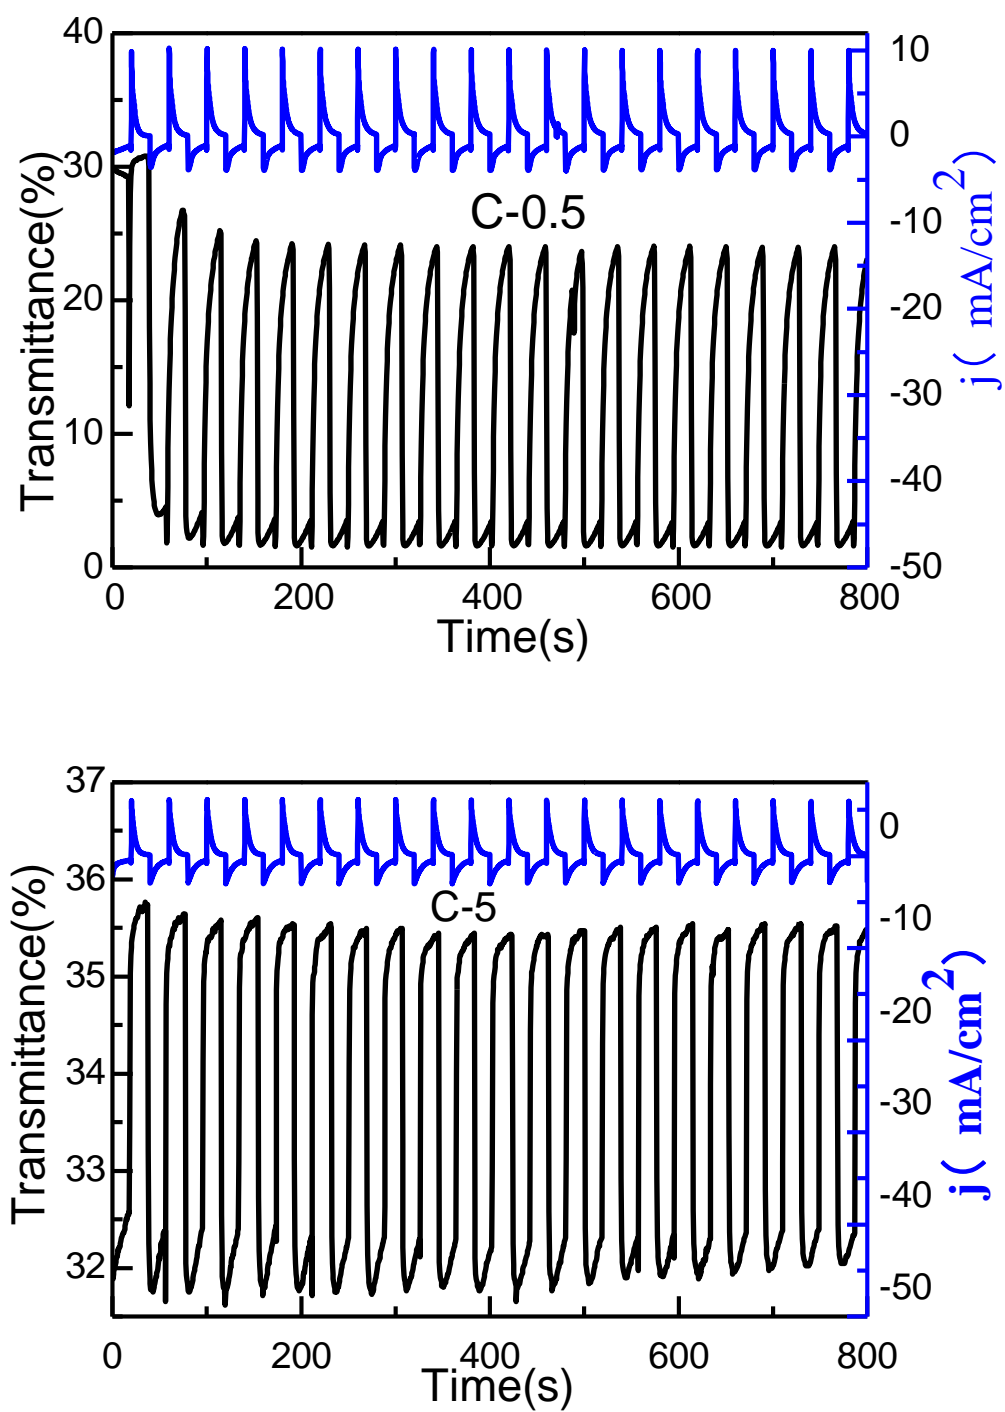

**Fig. S10** Dynamic changes of the transmittance and current upon switching the potential between  $-0.2 \leftrightarrow 0.9$  V (vs. Ag / AgCl) with a pulse width of 40 s applied to the cast film of PA on the ITO-coated glass slide in MeCN containing 0.1 M LiClO<sub>4</sub>. The absorption was recorded at 470 nm.

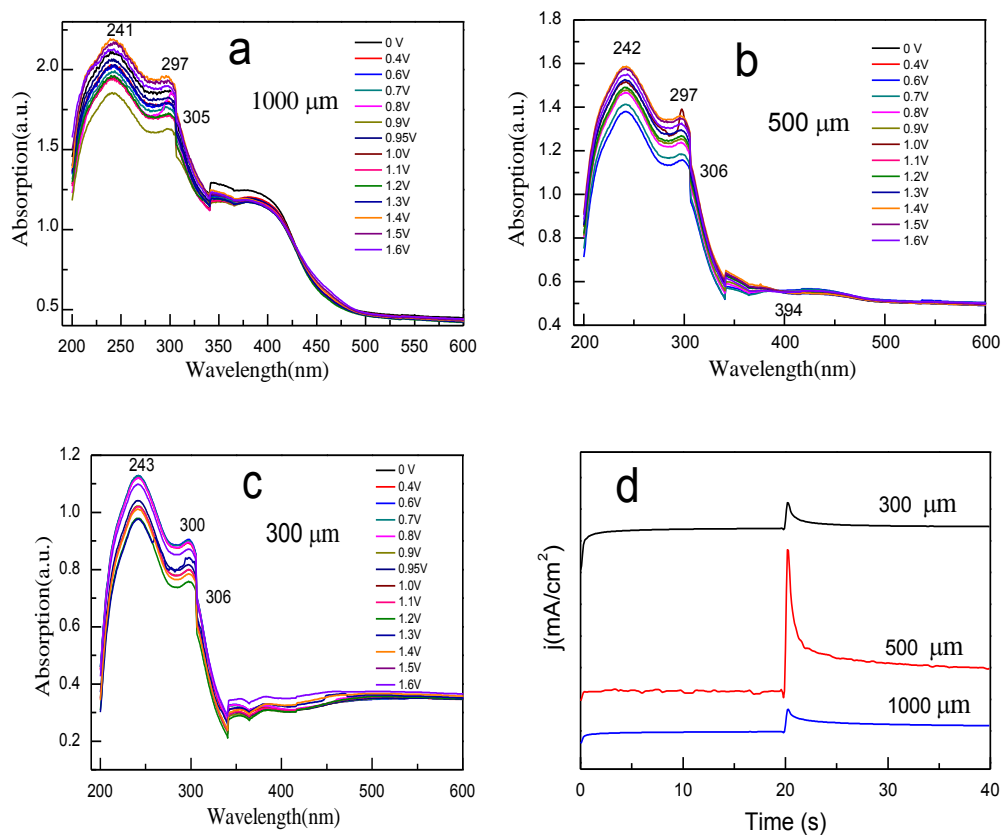

**Fig. S11** Electrochromic behavior of C-2 from 0.0 to 1.6 V with 0.05 V potential intervals (V vs. Ag/AgCl)

at different thickness (a, b, c), and the dynamic changes of the current upon switching the potential between -0.2  $\leftrightarrow$  0.9 V (vs. Ag / AgCl) with a pulse width of 40 s applied to the cast film of C-2 with different thickness (d). The absorption was recorded at 434 nm.

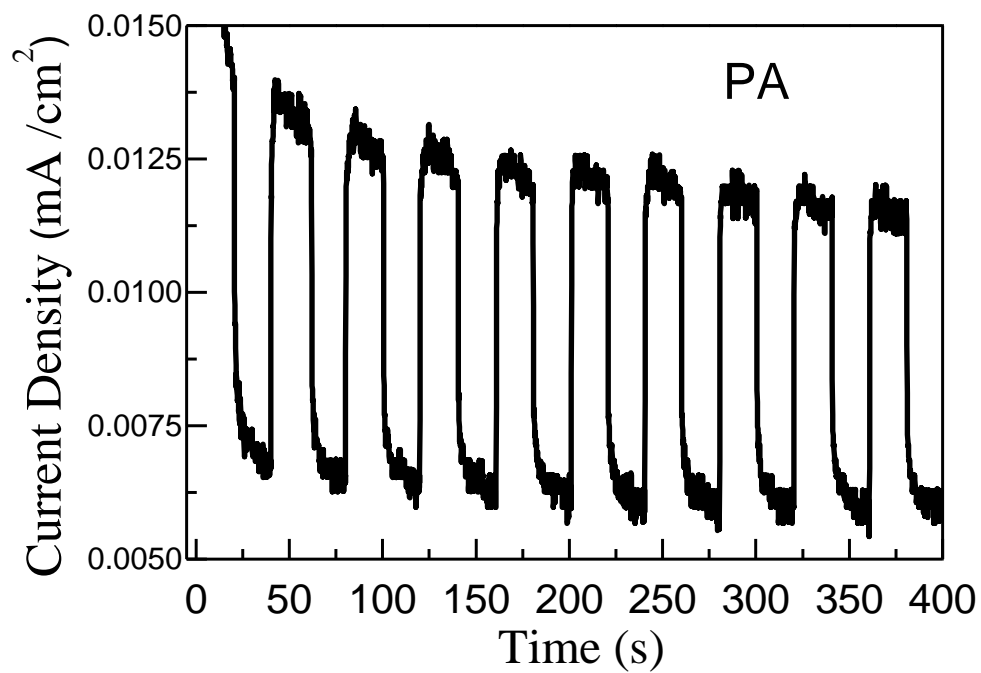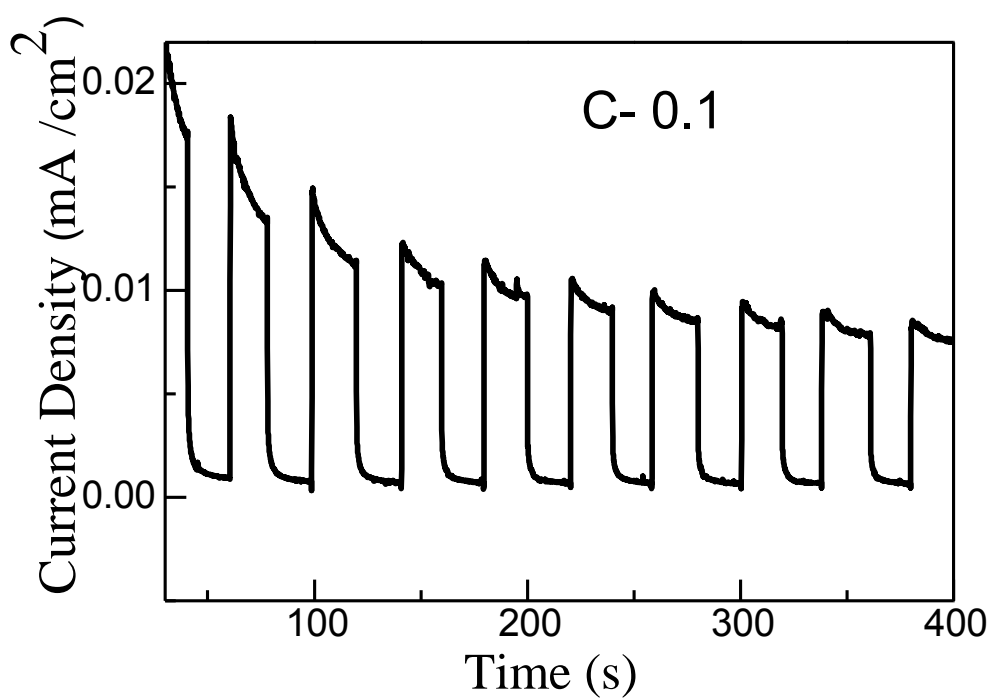

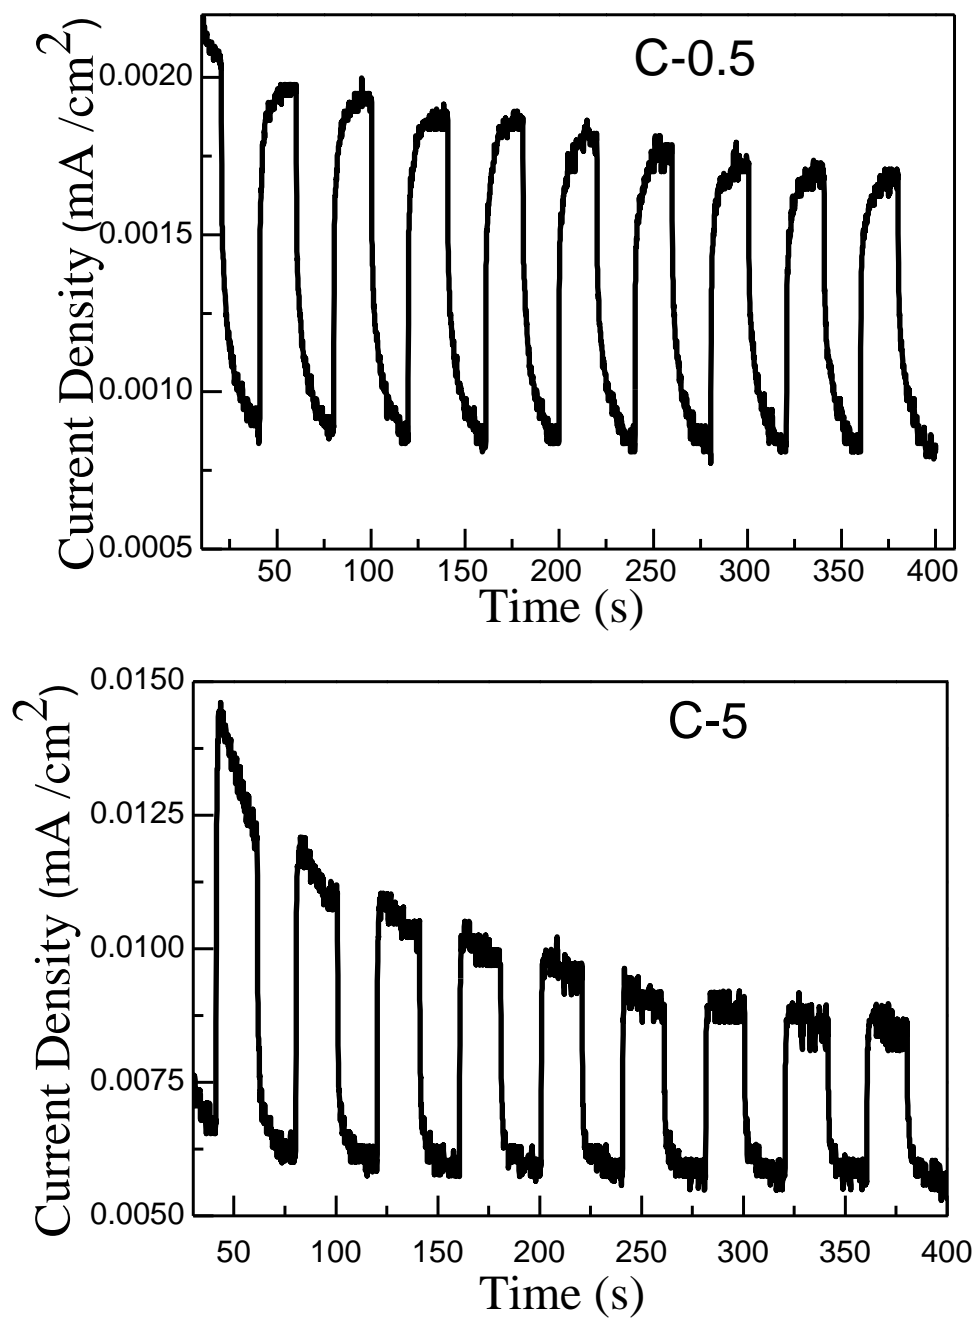

**Fig. S12** Typical photocurrent responses for composites immobilized ITO glass upon exposure to on/off light at room temperature.

Table S1 Electrochemical impedance data for PA and composite

|       | $R_s$ ( $\Omega$ ) | $R_{ct}$ ( $\Omega$ ) | CPE (F)   |
|-------|--------------------|-----------------------|-----------|
| PA    | 73.24              | 28411                 | 0.0002473 |
| C-0.1 | 89.15              | 3553                  | 0.005133  |
| C-0.5 | 107.6              | 3044                  | 0.00699   |
| C-2   | 64.94              | 397.8                 | 2.303E-6  |
| C-5   | 139.7              | 1332                  | 3.802E-9  |

- [1] Cai, J. W.; Niu, H. J.; Wang, C.; Ma, L. N.; Bai, X. D.; Wang, W. *Electrochim Acta* 2012, 76, 229–241.
